# Supplementary figures and images for: Contribution of dorsal horn CGRP-expressing interneurons to mechanical sensitivity
Source: eLife journal article supplement (doi:10.7554/elife.59751), 2021-06-01

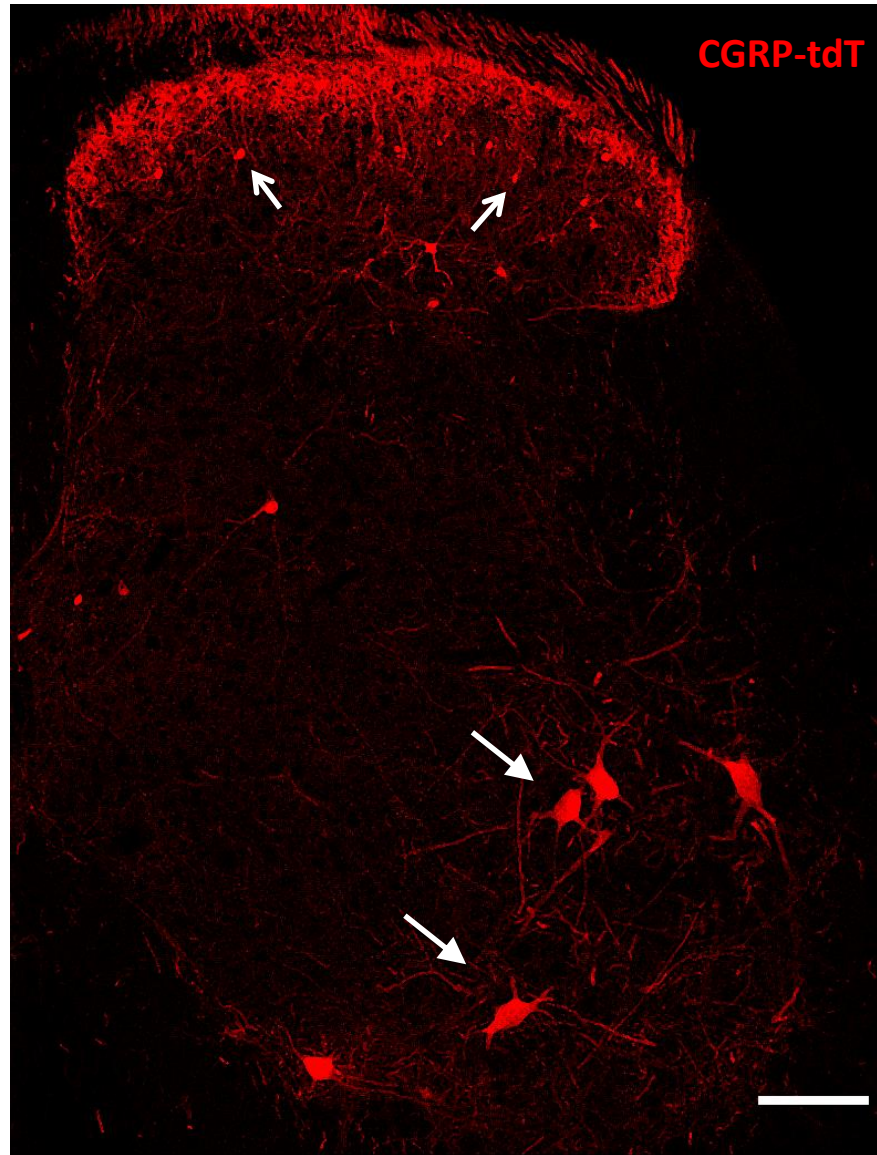

Supplement: supp [file elife-59751-supp-v1.zip]

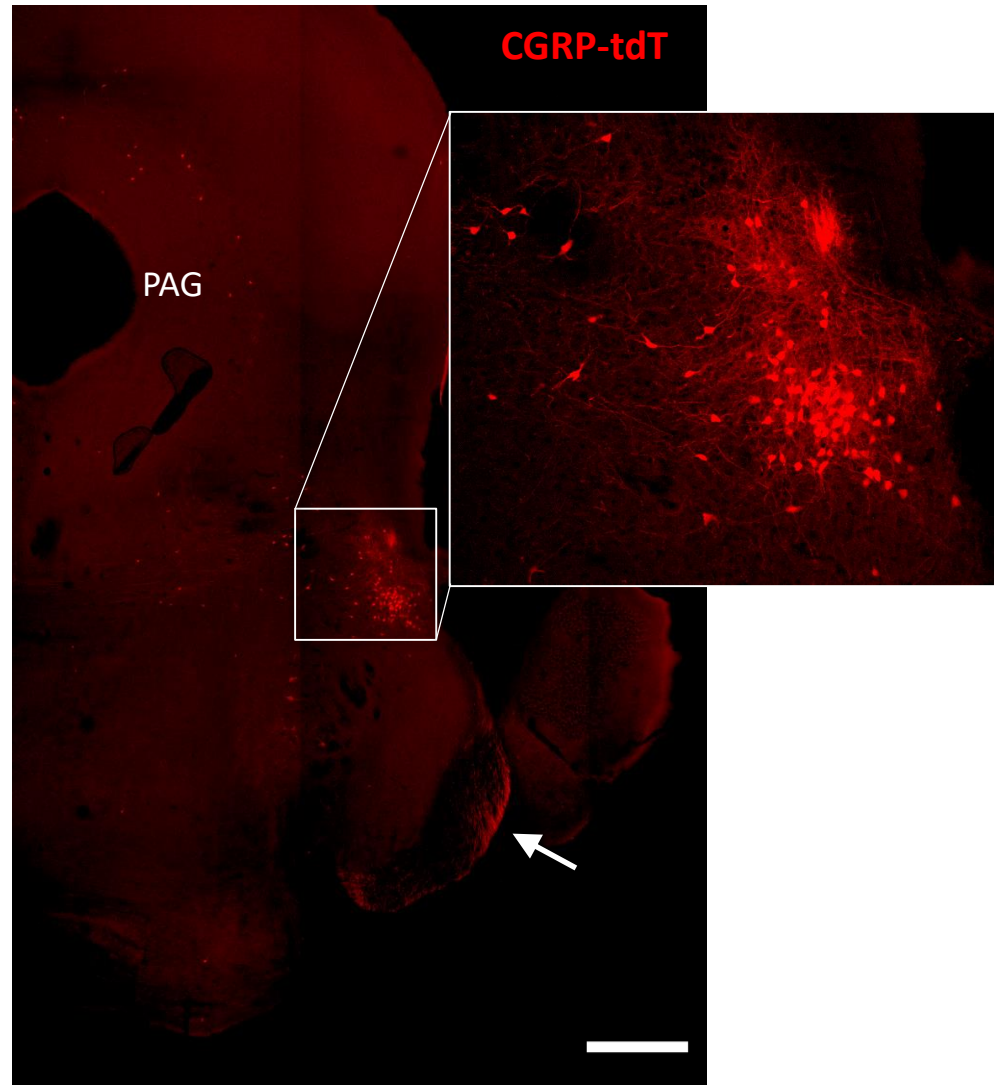

Supplement: supp [file elife-59751-supp-v1.zip]

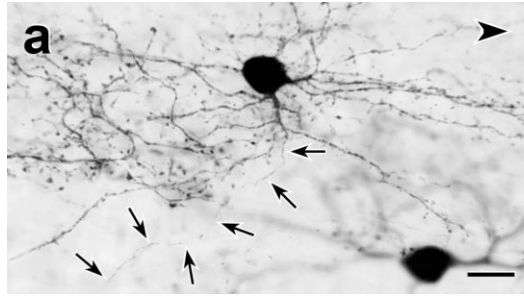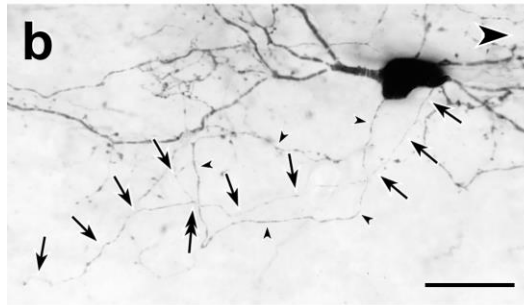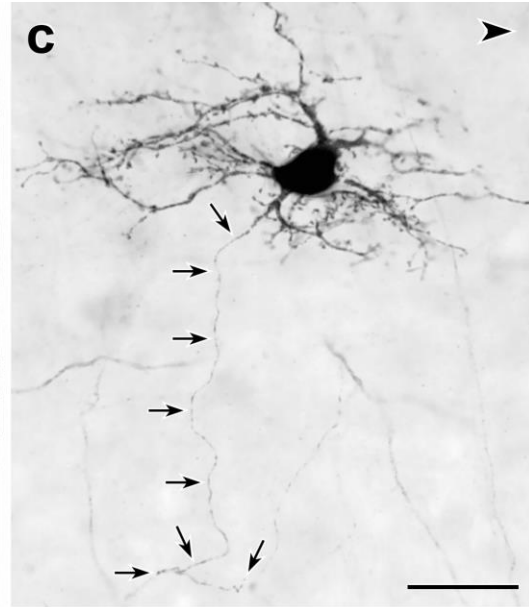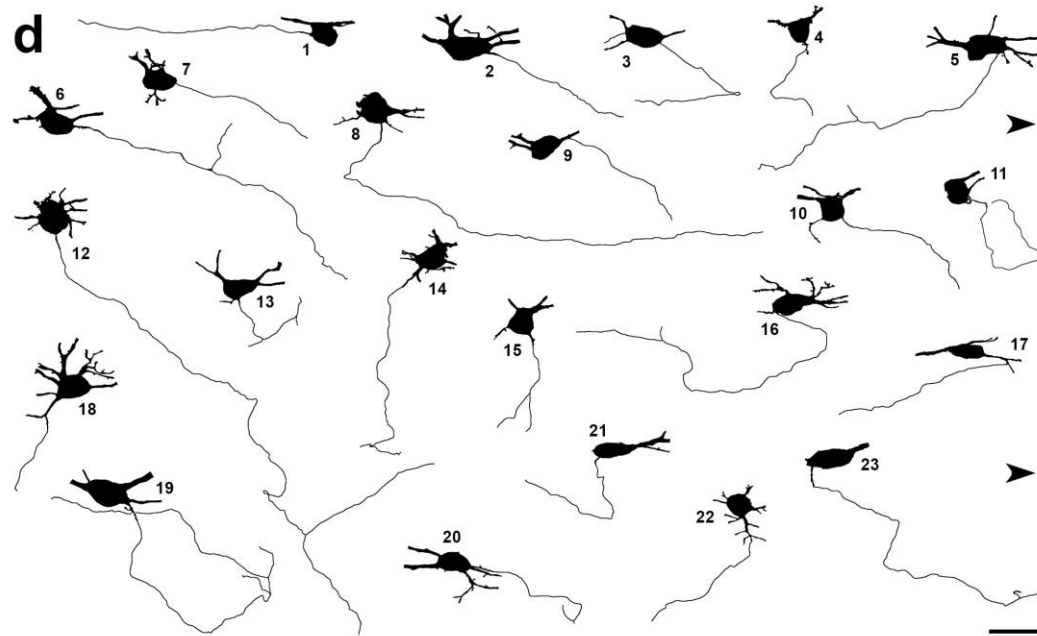

Supplement: supp [file elife-59751-supp-v1.zip]

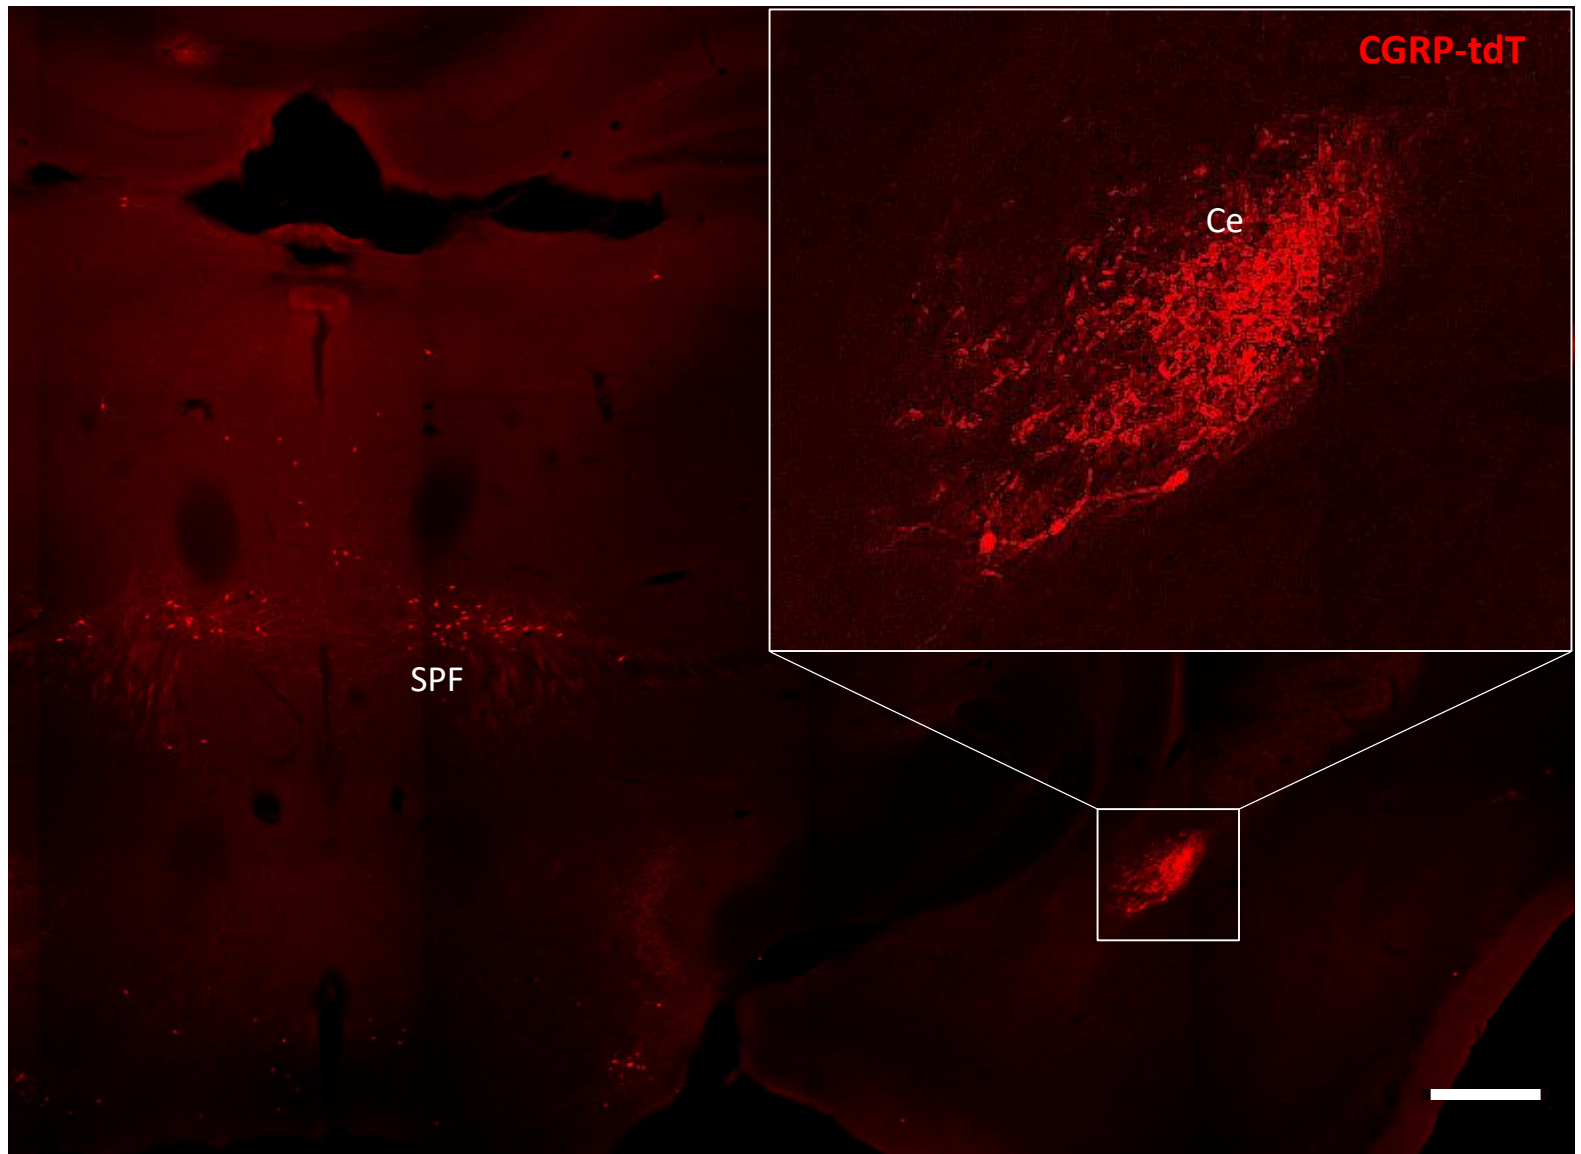

Supplement: supp [file elife-59751-supp-v1.zip]

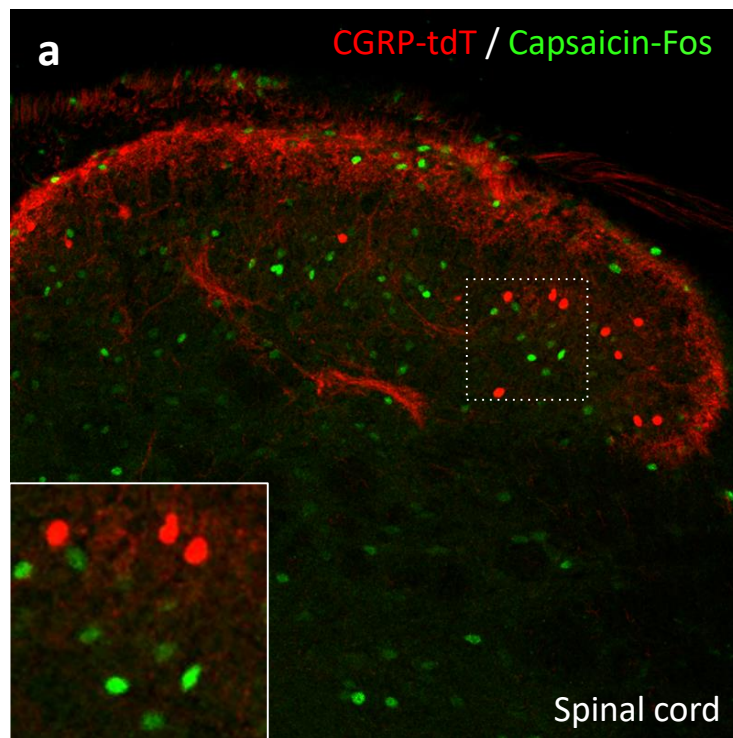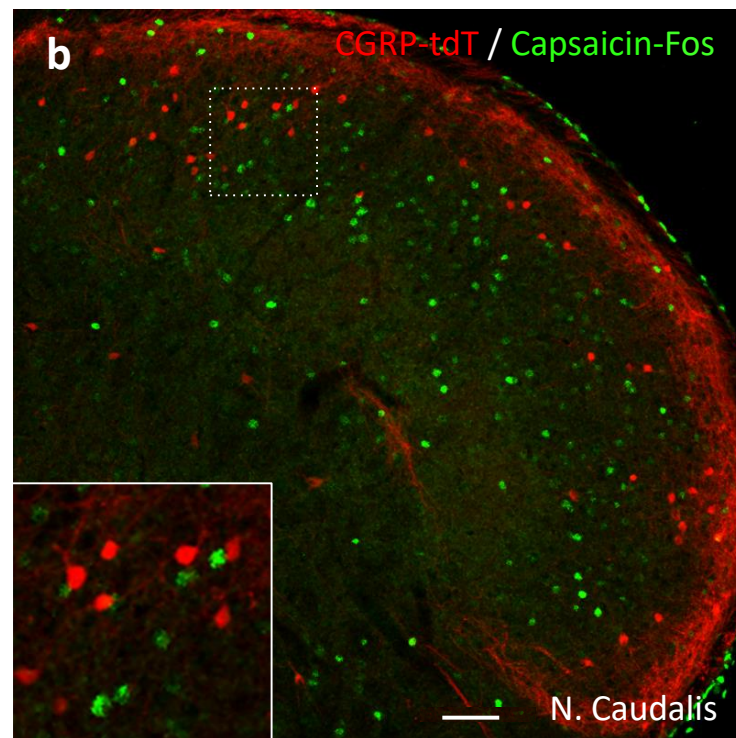

Supplement: supp [file elife-59751-supp-v1.zip]

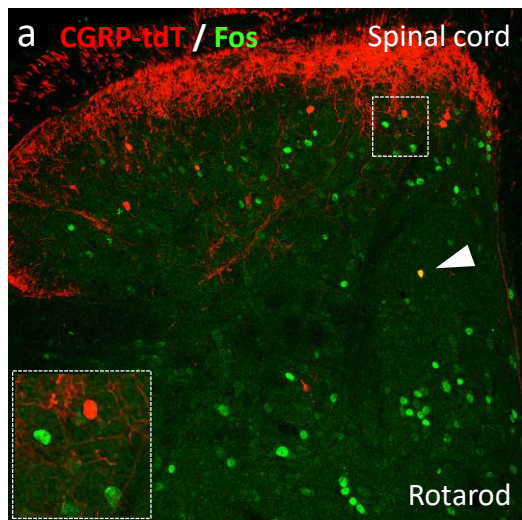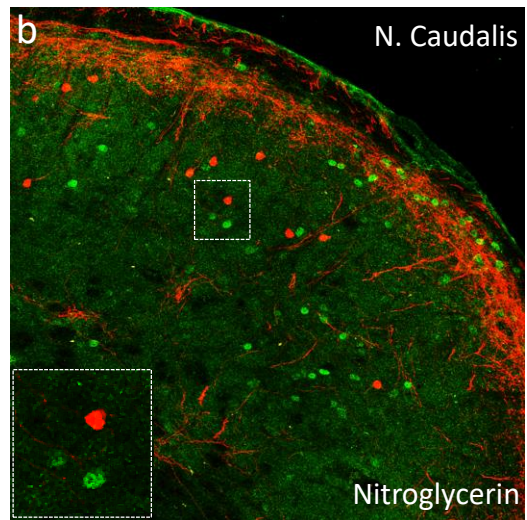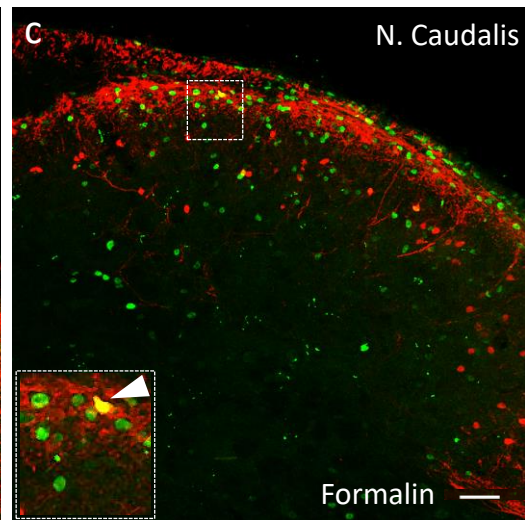

Supplement: supp [file elife-59751-supp-v1.zip]

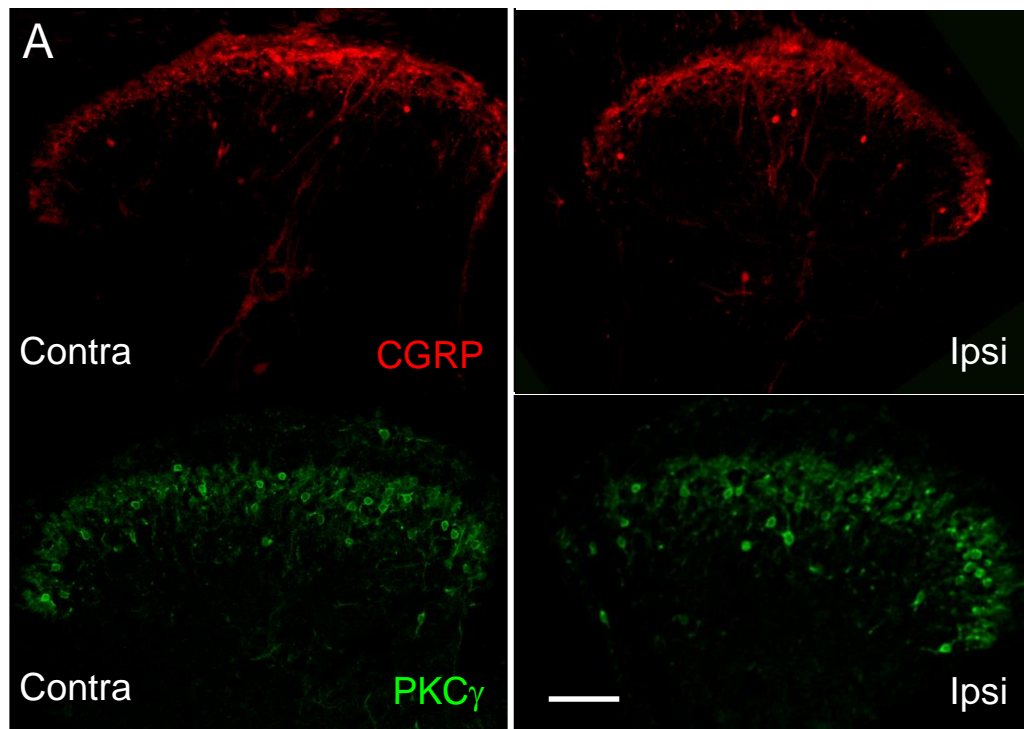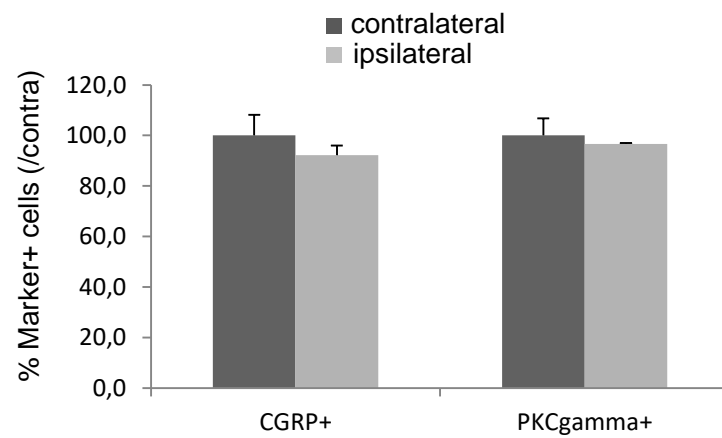

Supplement: supp [file elife-59751-supp-v1.zip]

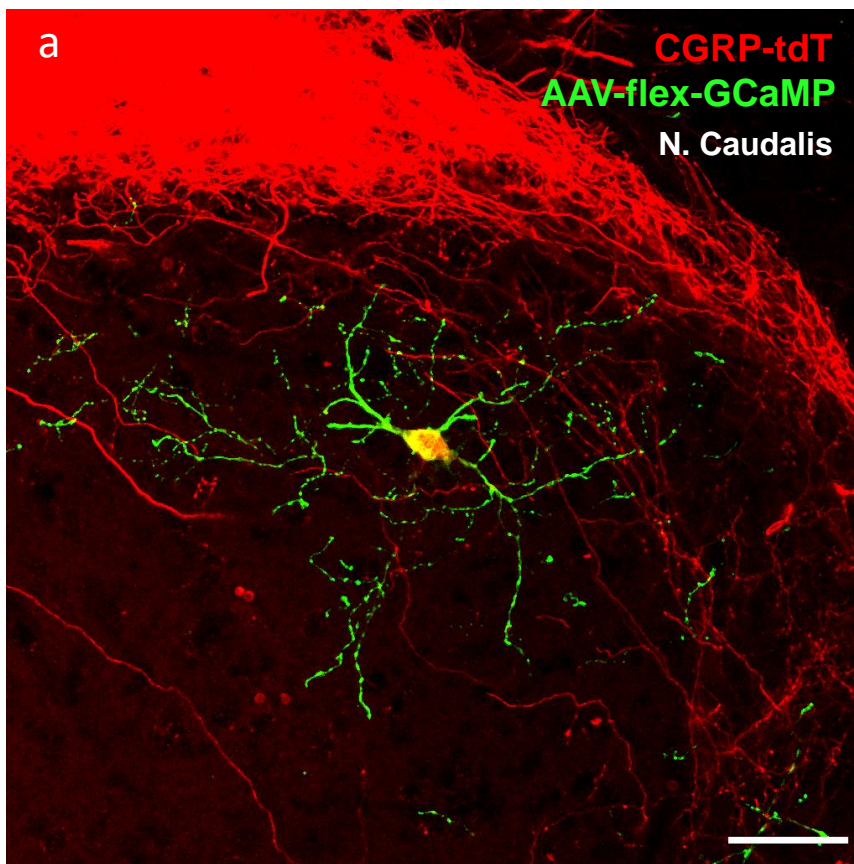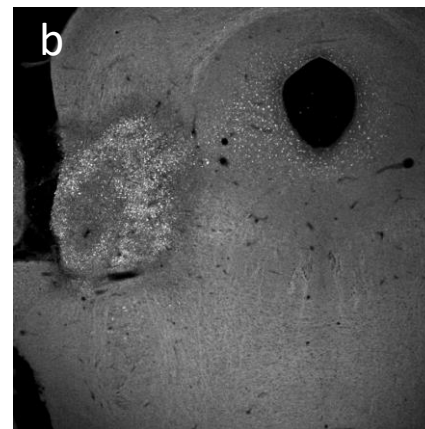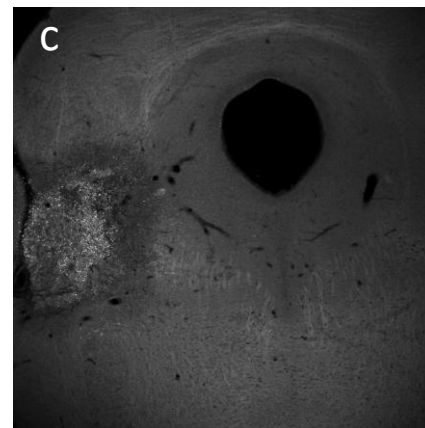

Supplement: supp [file elife-59751-supp-v1.zip]

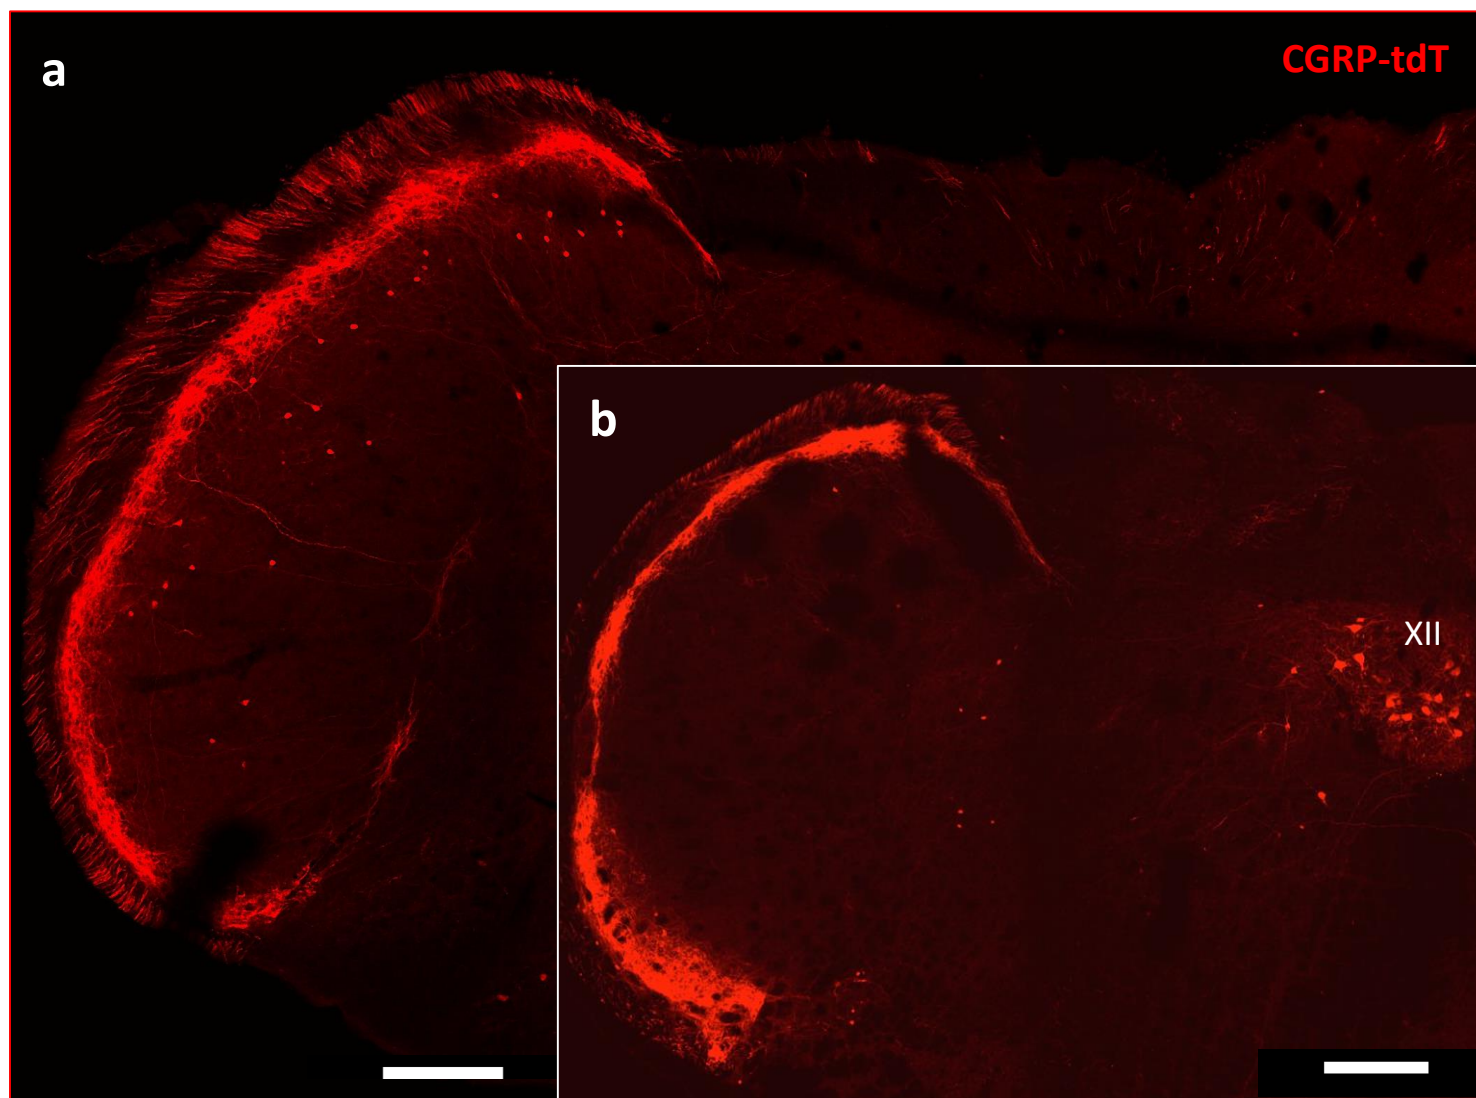

Supplement: supp [file elife-59751-supp-v1.zip]

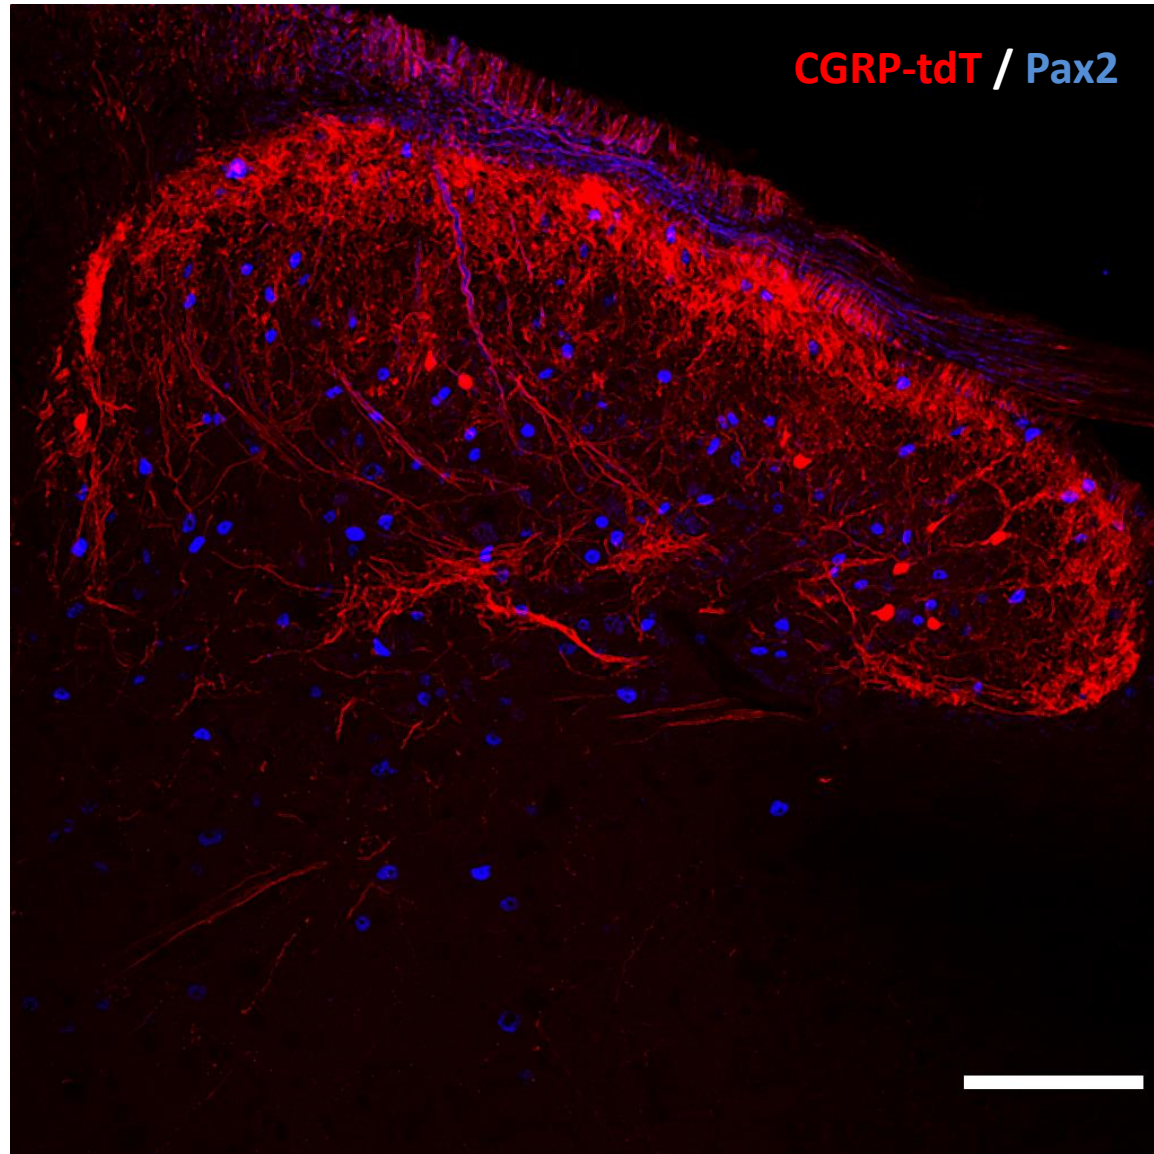

Supplement: supp [file elife-59751-supp-v1.zip]
